# Supplementary material
Source: PubMed Central journal article supplement (PMC2700870)
Supplement: 10142_2009_122_MOESM1_ESM.pdf [file 10142_2009_122_MOESM1_ESM.pdf]

## Gene 1

MKTFIIFVLLAMAMNIASA  
 SRLLSPRGKELHT  
 PQQ  
FPQQQ  
 FPQPQQ  
 FPQQQ  
 IPQQHQ  
 IPQQPQQ  
 FPQQQ  
 FLQQQ  
 IPQQQ  
 IPQQHQ  
 IPQQPQQ  
 FPQQQ  
 FPQQQ  
 FPQQQ  
 FPQQHQ  
 SPQQQ  
 FPQQQ  
 FPQQQ  
 LPQQE  
 FPQQQ  
 ISQQPQQ  
 LPQQQ  
 IPQQPQQ  
 FLQQQ  
 FPQQQ  
 PPQQHQ  
 FPQQQ  
 LPQQQ  
 IPQQQ  
 IPQQPQQ  
 IPQQQ  
 IPQQPQQ  
 FPQQQ  
 XPQQQ  
 FPQQQ  
 FPQQE  
 FPQHT  
 IPQQQ  
 IAQQPQQ  
 LPQQQ  
 IPQQPQQ  
 FPQQQ  
 FPQQQ  
 SPQQQ  
 FPQQQ  
 FPQQQ  
 LPQQQ  
 FPQPQQ  
 IPQQQ  
 ITQQPQQ  
 FPHQ  
 YPQQQ  
 FPQQE  
 FPQQQ  
 FPQQQ  
 FHQQQ  
 LPQQQ  
FPQQ  
 FPQQQ  
 FPQQQ  
 FPQQQ  
 LPQQQ  
 FPRPQQ  
 SPEQQ  
 FPQQQ  
 LPQQ  
 PPQQ  
 FPQQQ  
 FPIPY  
 PPQSQE  
 PSPYQQ  
 YPQQQ  
 PSRSNVRISIGL.

## Gene 1Ψ

MKTFIIFVLLAMAMNIASA  
 TROLSPRGKELHT  
 POEQ  
 FPQQQ  
 FPQPQQ  
 FPQQQ  
 IPQQQ  
 FPQQHQ  
 ISQQPQQ  
 FPQQ.  
 IPQQQ  
 ILQQHQ  
 NPQQPQQ  
 FPQQQ  
 SLQQQ  
 FLQQQ  
 FPQQQ  
 LPQQE  
 FPQQQ  
 IPQSQQ  
 LPRQQQ  
 IPQQPQQ  
 FPQLQ  
 FPQQQ  
 SPQQQ  
 FPQ.Q  
 FLQQ.Q  
 LSQQQ  
 FLQPQK  
 IPQQQ  
 IPQQPQQ  
 LPQQQ  
 FPQQQ  
 FPQ.Q  
 FLQQE  
 FPQQQ  
 FPQLQ  
 IAQSQQ  
 LPKQQQ  
 IPQQPQ.  
 FPQQQ  
 FPQQQ  
 SPQQQ  
 STQQQ  
 FPQQQ  
 LPQQQ  
 FPQPQQ  
 IPQQQ  
 IPQQPQQ  
 FPQQQ  
 IPQQQ  
 FSQQQ  
 SPQQQ  
 SLQQQ  
 IPQQQ  
 FPQRQ  
 FPQQQ  
 FTQPQQ  
 IPQQQ  
 IPQQPQQ  
 FPQQQ  
 FPQQHQ  
 FPRQQQ  
 LPR.Q  
 FPQQQ  
 FPQQQ  
 LPQQQ  
 FPQQQ  
 FPEQQ  
 FPQQQ  
 FPQQQ  
 LPQQQ  
 IPEQQ.  
 FPQQQ  
 FPQQ  
 PSQQ  
 FPQQQ  
 FPIPY  
 PPQSQE  
 PSPYQQ  
 YPQQQ  
 PYGSNVISISGR.

## Gene 2 Ψ

MKTFIIFVLLAMVMNIASA  
 SRQLSPRGKELHT  
 PQEQ  
FPQQQ  
 FPQQQ  
 FLQQQE  
 FPQQQ  
 LPQQ.  
 FPQPQQ  
 SPEQQ  
 CPQQQ  
 FPQQ  
 PPQ.  
 FPQQQ  
 FPIPY  
 PRQSQE  
 PSPYNQ  
 YPQQQ  
 PFGSDVISINGL.

## F2

LPPQK  
 LPQQQ  
 FP.QNKQ  
 FPEQ.  
 FPIPY  
 QQQQ  
 PFPHQ.S.Q  
 PSPHEQ  
 PTGSDVISITGR.

## F4

LAQQQ  
 LPQQQ  
 FP.QNKQ  
 FPEQ  
 FPIPY  
 QQQ  
 PFPQ.S.K  
 PSPHQ  
 PTGSDVISIIGR.

## γ-gliadin (AF234646)

PQQQ  
 PFRQPQQ  
 PFYQPQH  
 TFPQPQQ  
 TCPHPQQQ  
 FPQPQPQQ  
 PFPQPQPQQ  
 PFPQPQAQL  
 PFPQPQQ  
 PLQPQPQQ  
 PFPQSQPQQ  
 PFPQPQPQQ  
 SFPQQQ  
 PLIQ  
 PYLQQQ

## Gene F20b

MKTFIIFVLLAMAMKIATA  
 ARELNPKEKQ  
 SPQQ  
 SFSYQQQ  
 PFPQQ  
 PYPQQ  
 PYPQQ  
 PYPQQ  
 PFPTPQQ  
 QFPEQSQQ  
 PFTQPQQ  
 PTPIQPQQ  
 PFPQPQPQQ  
 PFPQPQQ  
 PFPWQPQQ  
 PFPQTAA  
 SFPLQPQQ  
 PFPQPQQ  
 PFPQPQL  
 PFPQQSEQ  
 IIPQQLQ  
 PFPLQPQQ  
 PFPQPQQ  
 PFPQPQQ  
 PIPVOPQQ  
 SFPQSQSQSQ  
 PFAQPQQ  
 LFPQLQ  
 PIPQPQQ  
 PFPLQPQQ  
 PFPQPQQ  
 PFPQPQQ  
 PFPQPQQ  
 PYPQQQ  
 PYGSSLTSIGGQ.

## Gene G3

MKTFIIFVLLAMAMNIATA  
 ARQLNPSNKELQ  
 SPQQ  
 SFSHQ  
 PFPQK  
 SYPQQ  
 PYPHQ  
 PYPLQ  
 PFPTPQQ  
 QFPQSQ  
 PFPQPQQ  
 PTPLQPQQ  
 PFPQPQQ  
 PFPQPQQ  
 PFPWQP  
 PFPQTQQ  
 SFPLQPQQ  
 PFPQPQQ  
 PFPQPQL  
 PFPQPPEQ  
 IIPQPNQ  
 PFPLQPQQ  
 PFPQQ  
 PFPQPQ.  
 PFPQSQ  
 PIPVQLQ  
 PLPQSQSQSQ  
 PFPQPQQ  
 LFPQLQ  
 PIPQPQQ  
 PFPLHPQQ  
 PSPQSQ  
 PFPQPQQ  
 PFPLQPQQ  
 PSPLQPQQ  
 PFSQPQSQSQ  
 SFPQPQPQPQQ  
 PSILQPQPQQ  
 PFLQPQQ  
 QLSQLEQ  
 TISQPQQ  
 PTPQPQPQQ  
 PYPQQQ  
 PSGSSLTSIGGQ.
