# Supplementary material
Source: PubMed Central journal article supplement (PMC2700870)
Supplement: 10142_2009_122_MOESM4_ESM.pdf [file 10142_2009_122_MOESM4_ESM.pdf]

|      |                                                                                                           |      |      |      |      |                    |
|------|-----------------------------------------------------------------------------------------------------------|------|------|------|------|--------------------|
|      | 720                                                                                                       | 740  | 760  | 780  | 800  |                    |
| 623  | AACCCTTTGCC---AGCCCCAACAAATTATTTCTGAACT-CCA--ACAACCAATCCCAGCAACCAACAACCAATTCCCCCTGCAACCGCAACAACC          |      |      |      |      | AY6670978-Hassani  |
| 623  | AACCCTTTGCC---AGCCCCAACAAATTATTTCTGAACT-CCA--ACAACCAATCCCAGCAACCAACAACCAATTCCCCCTGCAACCGCAACAACC          |      |      |      |      | EF116278-Liu       |
| 623  | AACCCTTTGCC---AGCCCCAACAAATTATTTCTGAACT-CCA--ACAACCAATCCCAGCAACCAACAACCAATTCCCCCTGCAACCGCAACAACC          |      |      |      |      | AF280605-F20b-Hsia |
| 638  | AACCCTTTCCCC---GACCCCAACAATTATTTCTGAACT-CCA--ACAACCAATCCCAGCAAGCGCAACAACCAATTCCCCCAACAATCGCAACAACC        |      |      |      |      | EF116277-Liu       |
| 629  | AACCCTTTCCCC---GGCCTCAACAATTATTTCTGAACT-CCA--ACAACCAATCCCAGCAACCAACAACCAATTCCCCCTGCAACCGCAACAACC          |      |      |      |      | AF280606-G3-Hsia   |
| 678  | AACCATTCCCCCTGCAACCGCAACAACGATTTCCCAACAACCAAGAAACAAAATTTCCAGGAACCCCAACAACCAATTCTCTGTGAGCCCAACAACC         |      |      |      |      | AB059812-Masoudi   |
| 680  | AACCATTCCCCCTGCAACCGCAACAACGATTTCCCAACAACCAAGAAACAAAATTTCCAGGAACCCCAACAACCAATTCTCTGTGAGCCCAACAACC         |      |      |      |      | DQ307378-Hao       |
| 678  | AACCATTCCCCCTGCA-CCGCAACAACGATTTCCCA-CA-CCAG-ACAAAAA-TTTCCAGGAACCCCAACAACCAATTCTCTGTGCA---GCACACACC       |      |      |      |      | AY591334-Chen      |
| 581  | AACCATTCTCTGTGAGCCGCAAGCAACGATTTTCCAGCC-CCA--ACAACCAATTATCCCAGCAACCAAGCAACAATAATTCCCCAGCAACCCTCAACAACC    |      |      |      |      | AJ937839-Snegaroff |
|      | 820                                                                                                       | 840  | 860  | 880  | 900  |                    |
| 717  | ATTCCCCAGCAACCGCAACAACCAATTCCCCAGCAACCGCAACAATCATTCCCAGCAACCAACAACCAATTATCCCCAG-CAA---CAACAATCAATT        |      |      |      |      | AY6670978-Hassani  |
| 717  | ATTCCCCAGCAACCGCAACAACCAATTCCCCAGCAACCGCAACAATCATTCCCAGCAACCAACAACCAATTATCCCCAG-CAA---CAACAATCAATT        |      |      |      |      | EF116278-Liu       |
| 717  | ATTCCCCAGCAACCGCAACAACCAATTCCCCAGCAACCGCAACAATCATTCCCAGCAACCAACAACCAATTATCCCCAG-CAA---CAACAATCAATT        |      |      |      |      | AF280605-F20b-Hsia |
| 732  | ATTCCCCAGCAACCGCAACAACCAATTCCCCAGCAACCGCAACAATCATTCCCAGCAACCAACAACCAATTATCCCCAG-CAA---CAACAATCAATT        |      |      |      |      | EF116277-Liu       |
| 723  | ATCCCCAGCAATCAACAACCAATTCCCCAGCAACCGCAACAATCATTCCCAGCAACCAACAACCAATTATCCCCAG-CAA---CAACAATCAATT           |      |      |      |      | AF280606-G3-Hsia   |
| 778  | ATTTTCCCGG---CCCAACAACCAATTCCCCAGCAACCGCAACAATCAATTCCCAGCAACCGCAACAACCAATTCCCCCTGGCAACGGCAACAACCGTT       |      |      |      |      | AB059812-Masoudi   |
| 780  | ATTTTCCCGG---CCCAACAACCAATTCCCCAGCAACCGCAACAATCAATTCCCAGCAACCGCAACAACCAATTCCCCCTGG-CAACCGCAACAACCGTT      |      |      |      |      | DQ307378-Hao       |
| 770  | ATTTTCCCGG---CCCAACAACCAATTCCCCAGCAACCGCAACAATCAATTCCCAGCAACCGCAACAACCAATTCCCCCTGG-CAACCGCAACAACCGTT      |      |      |      |      | AY591334-Chen      |
| 678  | ATCCCCCTCAACCGCAACAACCAATTCCCCAGCAACCGCAACAATCAATTCCCAGCAACCGCAACAACCAATTCTCTGTG-CAATCGCAACAACCAATT       |      |      |      |      | AJ937839-Snegaroff |
|      | 920                                                                                                       | 940  | 960  | 980  | 1000 |                    |
| 813  | CCCGCAG-CAACCGCAACAACCAATTCCCTCCAACAACCAACA-CAACCAATCCCTCAACAACCAACAACCAATTCCCTTAGCAGCCGCAACAACCAATTC     |      |      |      |      | AY6670978-Hassani  |
| 792  | CCCGCAG-CAACCGCAACAACCAATTCCCTCCAACAACCAACA-CAACCAATCCCTCAACAACCAACAACCAATTCCCTTAGCAGCCGCAACAACCAATTC     |      |      |      |      | EF116278-Liu       |
| 790  | CCCGCAG-CAACCGCAACAACCAATTCCCTCCAACAACCAACA-CAACCAATCCCTCAACAACCAACAACCAATTCCCTTAGCAGCCGCAACAACCAATTC     |      |      |      |      | AF280605-F20b-Hsia |
| 806  | TCCCTCAACAACCAACAACCAATTTCCTTCTACAACCAACAACCAATTCCCCTAGCAGCCGCAACAACCAATTTCCTAGCAACCGCAACAACCAATTC        |      |      |      |      | EF116277-Liu       |
| 755  | TCCCTCAACAACCAACAACCAATTTCCTTCTACAACCAACAACCAATTCCCCTAGCAGCCGCAACAACCAATTTCCTAGCAACCGCAACAACCAATTC        |      |      |      |      | AF280606-G3-Hsia   |
| 875  | TCCCTGGCAACCCGCAACAACCAATTTCCTTCTACAACCAACAACCAATTCCCCTAGCAGCCGCAACAACCAATTTCCTAGCAACCGCAACAACCAATTC      |      |      |      |      | AB059812-Masoudi   |
| 876  | TCCCTGG-CAACCCGCAACAACCAATTTCCTTCTACAACCAACAACCAATTCCCCTAGCAGCCGCAACAACCAATTTCCTAGCAACCGCAACAACCAATTC     |      |      |      |      | DQ307378-Hao       |
| 864  | TCCCTGG-CAACCCGCAACAACCAATTTCCTTCTACAACCAACAACCAATTCCCCTAGCAGCCGCAACAACCAATTTCCTAGCAACCGCAACAACCAATTC     |      |      |      |      | AY591334-Chen      |
| 777  | CAACCCAG-CAACCCGCAACAACCAATTTCCTTCTACAACCAACAACCAATTCCCCTAGCAGCCGCAACAACCAATTTCCTAGCAACCGCAACAACCAATTC    |      |      |      |      | AJ937839-Snegaroff |
|      | 1020                                                                                                      | 1040 | 1060 | 1080 | 1100 |                    |
| 911  | CCCAGCAACCCCAACAATCA-----CAACAATCATTTCAGC-CC---CAA-----CCCAGCAACCCCAACAACCAAT-CCATCC                      |      |      |      |      | AY6670978-Hassani  |
| 890  | CCCAGCAACCCCAACAATCA-----CAACAATCATTTCAGC-CC---CAA-----CCCAGCAACCCCAACAACCAAT-CCATCC                      |      |      |      |      | EF116278-Liu       |
| 790  | CCCAGCAACCCCAACAATCA-----CAACAATCATTTCAGC-CC---CAA-----CCCAGCAACCCCAACAACCAAT-CCATCC                      |      |      |      |      | AF280605-F20b-Hsia |
| 892  | CCCAGCAACCCCAACAATCA-----CAACAATCATTTCAGC-CC---CAA-----CCCAGCAACCCCAACAACCAAT-CCATCC                      |      |      |      |      | EF116277-Liu       |
| 824  | CCCAGCAACCCCAACAATCA-----CAACAATCATTTCAGC-CC---CAA-----CCCAGCAACCCCAACAACCAAT-CCATCC                      |      |      |      |      | AF280606-G3-Hsia   |
| 973  | CCCAGCAACCCCAACAATCAATTCCCCCTGCAACCGCAACAACCAATTCCCAGCAACCAACAACCAATTAATTC-CAACAACCCCAACAACCAATTCCTC      |      |      |      |      | AB059812-Masoudi   |
| 962  | CCCAGCAACCCCAACAATTAATTCCTGCAACCGCAACAACCAATTCCCAGCAACCAACAACCAATTAATTC-CAACAACCCCAACAACCAATTCCTC         |      |      |      |      | AY591334-Chen      |
| 872  | CCCAGCAACCGCAACAACCAATTCCCAGCAACCCCAACAACCAATTCCCAGCAACCCCAACAACCAATTCCTC                                 |      |      |      |      | AJ937839-Snegaroff |
|      | 1120                                                                                                      | 1140 | 1160 | 1180 | 1200 |                    |
| 983  | TTCAACCACAACAACCAATTACCCCAACAACAACAACCAATTTAAAGCAGCCCAACAACAATTTATCCCAGCAACCAACAACAATTTCCCAGCAACC         |      |      |      |      | AY6670978-Hassani  |
| 962  | TTCAACCACAACAACCAATTACCCCAACAACAACAACCAATTTAAAGCAGCCCAACAACAATTTATCCCAGCAACCAACAACAATTTCCCAGCAACC         |      |      |      |      | EF116278-Liu       |
| 790  | TTCAACCACAACAACCAATTACCCCAACAACAACAACCAATTTAAAGCAGCCCAACAACAATTTATCCCAGCAACCAACAACAATTTCCCAGCAACC         |      |      |      |      | AF280605-F20b-Hsia |
| 899  | TGCAACCACAACA-----CCACAACAACCAATTTCCAGCCCAACAACAATTTATCCCAGCAACTAGAACAACAATTTCCCAGCAACC                   |      |      |      |      | EF116277-Liu       |
| 896  | TGCAACCACAACA-----CCACAACAACCAATTTCCAGCCCAACAACAATTTATCCCAGCAACTAGAACAACAATTTCCCAGCAACC                   |      |      |      |      | AF280606-G3-Hsia   |
| 1072 | TGCAACTAGAGTAGTGTGTTCCCCATCAACCGCAATTA-CCATTTCCCAACCCCAACAACCAATTCCCTGAAACAAGCAGAACAATAATTTCCCAGCGACT     |      |      |      |      | AB059812-Masoudi   |
| 1061 | TGCAACTAGAGTAGTGTGTTCCCCATCAACCGCAATTAACCAATTTCCCAACCCCAACAACAACCAATTCCCTGAAACAAGCAGAACAATAATTTCCCAGCGACT |      |      |      |      | AY591334-Chen      |
| 971  | TGCAACCACAACAATGTTCCCCATCAACCCCAACAACAACCAATTTCCCAACCCCAACAACAACCAATTCCCGCAACAAGGAGAACAATAATTTCCCAGCAACC  |      |      |      |      | AJ937839-Snegaroff |
|      | 1220                                                                                                      | 1240 | 1260 | 1280 | 1297 |                    |
| 1083 | CCAACAACCAATTCCCCAGCAACCAACAACCTCAACAACCAATCCACAACAACAACCAATATGGGAGTAGTCTTACAAGCATCGGTGGCCAATGA           |      |      |      |      | AY6670978-Hassani  |
| 1062 | CCAACAACCAATTCCCCAGCAACCAACAACCTCAACAACCAATGTCCACAACAACAACCAATATGGGAGTAGTCTTACAAGCATCGGTGGCCAATGA         |      |      |      |      | EF116278-Liu       |
| 790  | CCAACAACCAATTCCCCAGCAACCAACAACCTCAACAACCAATGTCCACAACAACAACCAATATGGGAGTAGTCTTACAAGCATCGGTGGCCAATGA         |      |      |      |      | AF280605-F20b-Hsia |
| 984  | CCAACAACCAATTCCCCAGCAACCAACAACCTCAACAACCAATGTCCACAACAACAACCAATATGGGAGTAGTCTTACAAGCATCGGTGGCCAATGA         |      |      |      |      | EF116277-Liu       |
| 981  | CCAACAACCAACCCCAAGCAACCAACAACCTCAACAACCAATGTCCACAACAACAACCAATCTGGGAGTAGTCTTACAAGCATCGGTGGCCAATGA          |      |      |      |      | AF280606-G3-Hsia   |
| 1171 | CCAAAACCAATTCCCTCTACAGCCACCAACCACTGAGCAACCTTATCCGCAACAACAACCAATC-GGGAGTAGTGGTATAGGCATCAATGGCCAATGA        |      |      |      |      | AB059812-Masoudi   |
| 1161 | CCAAAACCAATTCCCTCTACAGCCACCAACCACTGAGCAACCTTATCCGCAACAACAACCAATC-GGGAGTAGTGGTATAGGCATCAATGGCCAATGA        |      |      |      |      | AY591334-Chen      |
| 1071 | CCAACAACCAATTCCCTCTGAGCCACCAACCACTGAGCAACCTTATCCACAACAATTAACCATC-TGGAGTAGTGGTATAGGCATCAATGGCCAATGA        |      |      |      |      | AJ937839-Snegaroff |
