# Supplementary material
Source: PubMed Central journal article supplement (PMC2700870)

a)

| Primer Name | Primer Sequence<br>5' – 3' | Template sequence<br>5' – 3' | DNA sequences for primer design     |
|-------------|----------------------------|------------------------------|-------------------------------------|
| AA-f2       | ACAATCATATCCGCTGC CA       | ACAATCATATCCGCTGC AA         | AB059812, AY591334, DQ307378        |
| AA-r2       | ATGGTCATTGTGGTTGTAGGAG     | ATGGTCATTGTGGTTGTAGGAG       | All DNAs of branch A/D in Figure 5  |
| EF116277f2  | GCAACAACCATTCCCCAACA CT    | GCAACAACCATTCCCCAACA AT      | ARQL-consensus, G3, EF116277        |
| AY667097f2  | AGATCGCCACTGCCGCTAG TG     | AGATCGCCACTGCCGCTAG GG       | AREL consensus, F20b, AY667097      |
| AY667097r1  | CATTGGCCACCGATGCTTGTAAAG   | CATTGGCCACCGATGCTTGTAAAG     | All DNAs of branch A/D' in Figure 5 |

b)

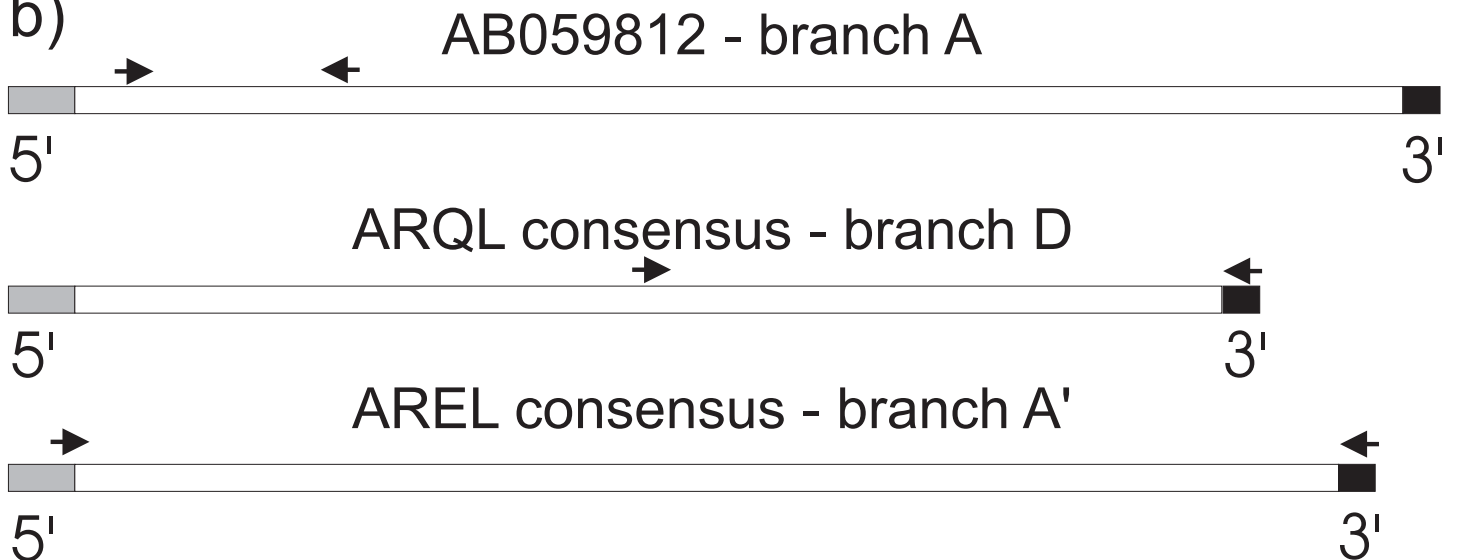

Supplement: 10142_2009_122_MOESM5_ESM.pdf [file 10142_2009_122_MOESM5_ESM.pdf]
