# Supplementary material
Source: PubMed Central journal article supplement (PMC2700870)
Supplement: 10142_2009_122_MOESM6_ESM.pdf [file 10142_2009_122_MOESM6_ESM.pdf]

>AREL consensus

ATGAAGACCTTCCTCATCTTTGTCTCCTTGCCATGGCGATGAAGATCGC  
CACTGCCGCTAGGGAGTTAAACCCCTAGCAACAAAGAGTTACAATCACCTC  
AACAAATCATTTTTCTATCAACAACAACCATTTCCACAGCAGCCATATCCA  
CAACAACCATATCCATCACAGCAACCATATCCATCGCAACAACCATTTCC  
CACACCCCAACAACAATTTCCCGAGCAATCACAACAACCATTTACCCAGC  
CCCAACAACCGACCCCATACAACCACAACAACCATTTCCCCAGCAACCC  
CAACAACCACAACAACCTTTTCCACAACCCCAACAACCATTTCCCTGGCA  
ACCACAACAACCATTTCCCCAGACCCAACAATCGTTCCCTCTCCAACCAC  
AACAGCCATTTCCCCAGCAACCCCAACAACCATTTCCCCAGCCCAACTA  
CCATTTCCCCAGCAACTCAGAACAATAATTCCCCAGCAACTCCAACAACC  
ATTTCCCCCTGCAACCGCAACAACCATTTCCCCAGCAACCCCAACAACCAT  
TTCCCCAGCCCAACAACAATCCCCGTGCAACCACAACAATCATTCCCC  
CAACAATCCAACAATCACAACAACCTTTTGCCAGCCCAACAATTATT  
TCCTGAACTCCAACAACCAATTTCCCCAGCAACCACAACAACCATTTCCCC  
TGCAACCGCAACAACCATTTCCCCAGCAACCGCAACAACCATTTCCCCAG  
CAACCGCAACAATCATTTCCCCAGCAACCACAACAACCATTTCCCCAGCA  
ACCGCAACAACCATTTCCCCCTGCAACTGCAACAACCATTTCCCCAACAAC  
CACAACAACCATTTCCCTCAACAACCACAACAACCATTTCTCTACGACCG  
CAACAACCATTTCCCCAGCAACGCCAACAATCACAACAATCATTTCCACA  
GCCCCAACCCAGCAACCCCAACAACCATTCGTTCTTCAACCACAACAAC  
CATTACCCCAACAACCACAACAACCATTTCCAGCAGCCCAACAACAATTA  
TTCCAGCAACCAGAACAACAATTTCCAGCAACCCCAACAACCATTTCCC  
CCAGCAACCACACCAACCTCAACAACCATATCCACAACAACAACCATATG  
GGAGTAGTCTTACAAGCATCGGTGGCCAATGA

>ARQL consensus

ATGAAGACCTTCCTCATCTTTGTCTCCTTGCCATGGCGATGAACATCGC  
CACTGCTGTAGGCAGCTAAACCCCTAGCAACAAAGAGCTACAATCACCTC  
AACAAATCATTTTTCCATCAACAACAACCATTTCCACAGCAACCATATCCA  
CAACAACCATATCCATCACARCAACCATATCCATCGCAACAACCATTTCC  
CACACCCCAACCACAATTTCCCCAGCAATCACAACAACCATTTMCCCAGC  
CCCAACAACCGAYCCCCCTACAACCACAACAACCATTTCCCCAGCAACCC  
CAACAACCACAACAACCTTTTCCACAGCCGCAACAACCATTTCCCTGGCA  
ACCACAACAACCATTTCCCCAGACCCAACAATCTTTCCCTCTGCAACCAC  
AACAACCATTTCCCCAGCAACCCCAACAACCATTTTCCCAGCCCAACTA  
CAATTTCCCCAGCAACCAGAACAATAATTCCCCAGCAACCCCAACAACC  
ATTCCTCCTGGAATCGCAACAACCATTTCCCCAGCAACCCCAACAACCAT  
TTYCCCAGCCCAACAACCTGATCCCCATGCAACCACAACAACCATTTCCC  
CAGCAATCCAACAATCACAACAACCTTTTCCCGGGCCCAACAATTATT  
TCCTGAACTCCAACAACCAATTTCCCCAGCAACCACAACAACCATTTCCCC  
TGCAACCGCAACAACCATTTCCCCAGCAATCGCAACAACCATTTCCCCAG  
CAACCMCAACAACCATGCCCCCTGCAACCGCAACAACCATTTCCCCAACA  
ACCACAACAACCATTTCCCCAACAACCACAACAACCTTTCCCCCTACAAC  
CACAACAACCATTTCCCCCTACGACCGCAACAACCATTTTCCCAGCAACCC  
CAACAATCACAACAATCATTTCCCCAGCCCAACCCAGCAACCCCAACA  
ACCATCCATCCTGCAACCACAACAACCATTTCTGCAGCCCAACAACAAT  
TATCCCAGCAACTAGAACAACAATTTCCCAGCAACCCCAACAACCATTC  
CCCCAGCAACCACACCAACCTCAACAACCATATCCACAACAACAACCATA  
TGGGAGTAGTCTTACAAGCATCGATGGCCAATGA
