# Supplementary material
Source: PubMed Central journal article supplement (PMC2700870)
Supplement: 10142_2009_122_MOESM7_ESM.pdf [file 10142_2009_122_MOESM7_ESM.pdf]

AREL Consensus AF280605-F20b

BE422668  
BE423582  
BE423915  
BF429185  
BG262698  
BJ233108  
BJ234368  
BJ236075  
BJ288330  
BQ245760  
BQ246853  
BQ247079  
BQ804207  
BQ804887  
CA717562  
CA733966  
CD890286  
CD909046  
CV065784

ARQL Consensus

BE423476  
BJ232465  
BJ233879  
BJ235153  
BQ244656  
BQ245390  
BQ246658  
BQ804207  
BQ804424  
BQ804665  
CA717631  
CA718637  
CA727112  
CA734224  
CD896637  
CD898544  
CD908862

Butte 86

| AREL     | ARQL     |
|----------|----------|
| BQ804887 | BQ804424 |
| BQ839049 | BQ804207 |
| BQ806672 | BQ804665 |
| BQ806801 |          |
| BQ807007 |          |
| BQ838934 |          |

Cheyenne

| AREL     | ARQL     |
|----------|----------|
| BE423915 | BE423476 |
| BE422668 |          |

Chinese Spring

| AREL     | ARQL     | B contig 1 | B contig 2 | B contig 3 |
|----------|----------|------------|------------|------------|
| BE590632 | BE637437 | BG262773   | BE590575   | BG604861   |
| BJ232260 | BG263062 | BJ233233   | BJ232980   | BJ235467   |
| BJ232654 | BJ232094 | BJ235268   | BJ233573   | BJ236585   |
| BJ232798 | BJ232277 | BJ235909   | BJ234995   | BJ237074   |
| BJ233029 | BJ232465 | BJ236386   | BJ235019   | BJ237628   |
| BJ233108 | BJ233292 | BJ239116   | BJ235215   | BJ237804   |
| BJ233566 | BJ234406 | BJ239513   | BJ235934   | BJ238375   |
| BJ233986 | BJ235153 | BJ240207   | BJ236645   | BJ239237   |
| BJ234578 | BJ237278 | BJ240415   | BJ238622   | BJ239243   |
| BJ236075 | BJ237923 | BJ240484   | BJ238698   | BJ239429   |
| BJ236779 | BJ238941 | BJ240576   | BJ239366   | BJ240091   |
| BJ288330 | BJ291572 | BJ240798   | BJ240198   | BJ240631   |
| BJ288883 | CJ633547 | BJ241115   | BJ240222   | BJ242426   |
| BJ289086 | CJ635325 | BJ241672   | BJ240426   | BJ242526   |
| CD453740 |          | BJ270841   | BJ240601   | BJ242617   |
| CJ634674 |          | BJ299471   | BJ240613   | CJ525758   |
| CJ635073 |          |            | BJ241142   | CJ527060   |
| CJ636734 |          |            | BJ242251   | CJ528157   |
| CJ637085 |          |            | BJ242273   | CJ635530   |
|          |          |            | BJ275853   |            |
|          |          |            | CJ524428   |            |
|          |          |            | CJ527479   |            |
|          |          |            | CJ632367   |            |
|          |          |            | CJ632633   |            |
|          |          |            | CJ632915   |            |
|          |          |            | CJ632946   |            |
|          |          |            | CJ635927   |            |

Glenlea

| AREL     | ARQL     |
|----------|----------|
| BQ245760 | BQ244656 |
| BQ246853 | BQ246658 |
|          | BQ245390 |

Recital

| AREL     | ARQL     | B contig 1 | B contig 2 | B contig 3 | B contig 4 |
|----------|----------|------------|------------|------------|------------|
| CD898769 | CD898544 | CD897780   | CD888403   | CD894182   | CD892017   |
| CD913440 | CD890286 | CD898029   | CD891568   | CD894183   | CD895691   |
| CD891467 |          | CD898915   | CD894328   | CD896770   | CD901091   |
| CD909046 |          | CD899224   | CD895699   | CD897555   | CD911629   |
| CD895754 |          | CD900023   | CD895716   | CD897707   | CD921444   |
| CD907252 |          | CD907099   | CD897404   | CD899045   |            |
| CD916362 |          | CD908681   | CD897658   | CD899086   |            |
| CD908667 |          |            | CD898550   | CD899242   |            |
| CD899396 |          |            | CD906122   | CD899968   |            |
| CD906891 |          |            | CD906859   | CD899969   |            |
| CD906982 |          |            | CD906860   | CD900063   |            |
| CD906257 |          |            | CD908744   | CD905441   |            |
| CD911169 |          |            | CD908828   | CD905531   |            |
| CD908621 |          |            | CD910418   | CD919298   |            |
| CD916329 |          |            | CD912759   | CD919465   |            |
| CD908289 |          |            | CD914924   |            |            |
| CD914689 |          |            |            |            |            |
| CD910709 |          |            |            |            |            |
| CD907132 |          |            |            |            |            |
| CD914629 |          |            |            |            |            |
| CD910763 |          |            |            |            |            |
| CD904539 |          |            |            |            |            |
