# Supplementary material
Source: PubMed Central journal article supplement (PMC2700870)

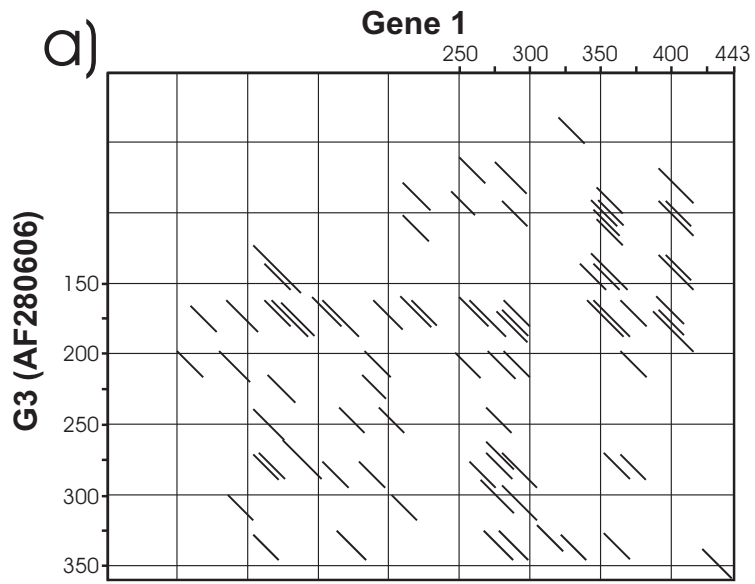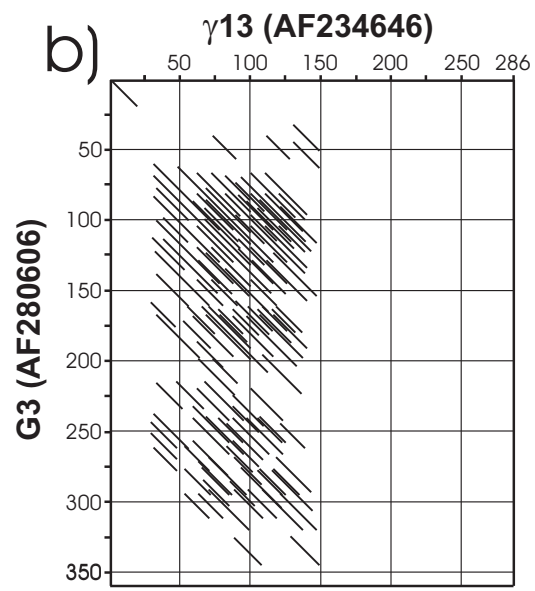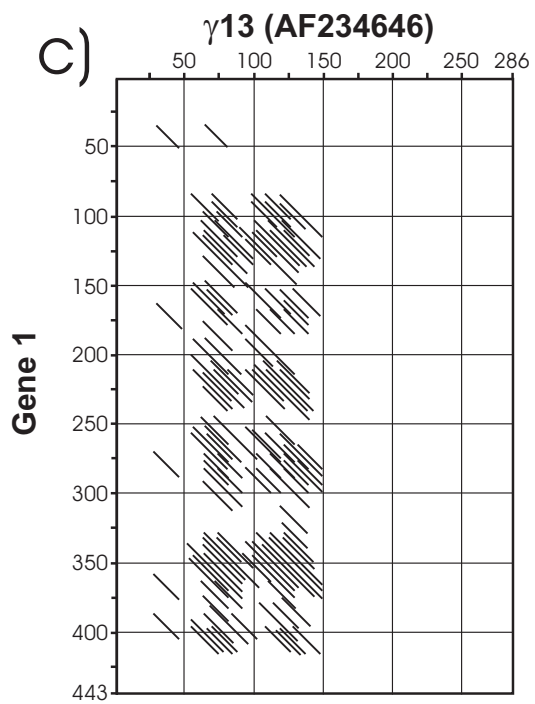

Supplement: 10142_2009_122_MOESM2_ESM.pdf [file 10142_2009_122_MOESM2_ESM.pdf]
